# Supplementary material
Source: ML conference proceedings conference paper supplement (https://openreview.net/forum?id=Mgq6kxl115)
Supplement: supplementary_material [file attachment]

Images

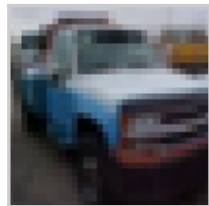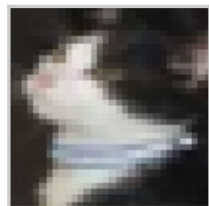

Source

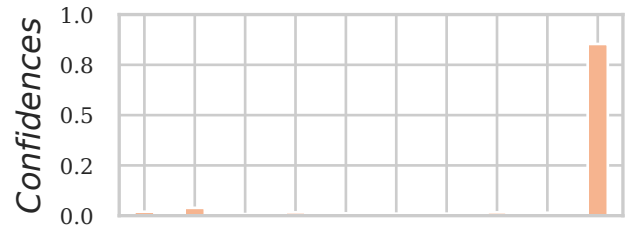

Diffusion Steps

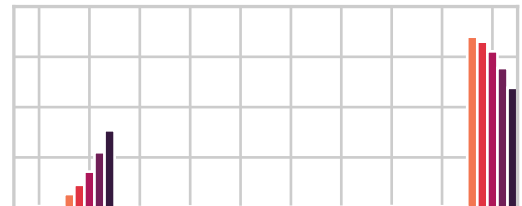

Target

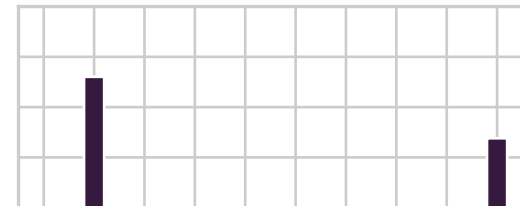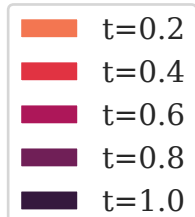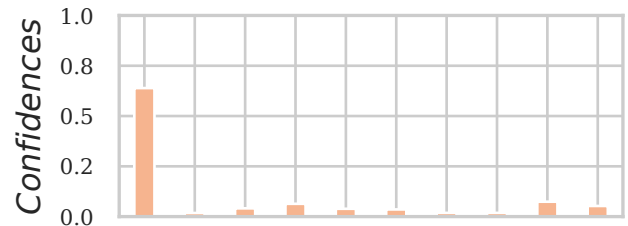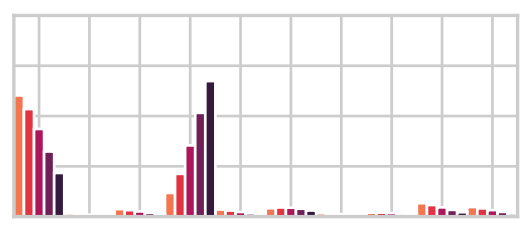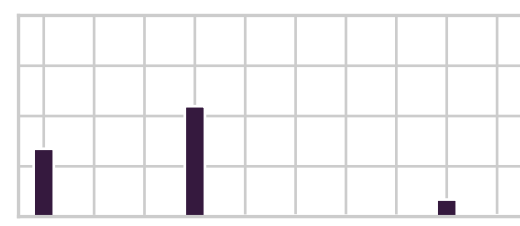

plane auto bird cat deer dog frog horse ship truck

plane auto bird cat deer dog frog horse ship truck

plane auto bird cat deer dog frog horse ship truck
