# Supplementary material
Source: ML conference proceedings conference paper supplement (https://openreview.net/forum?id=Mgq6kxl115)

Images

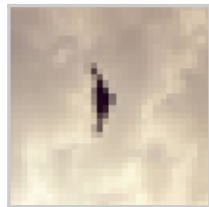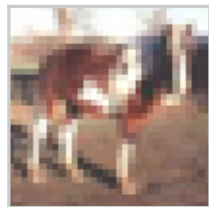

Source

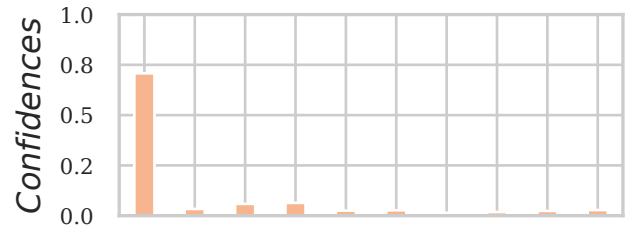

Diffusion Steps

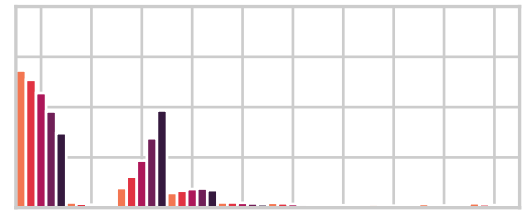

Target

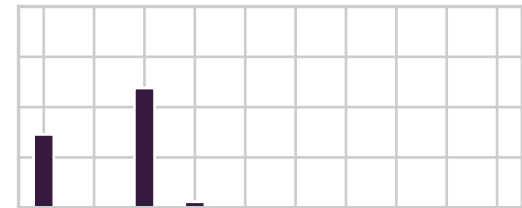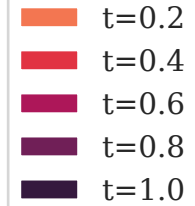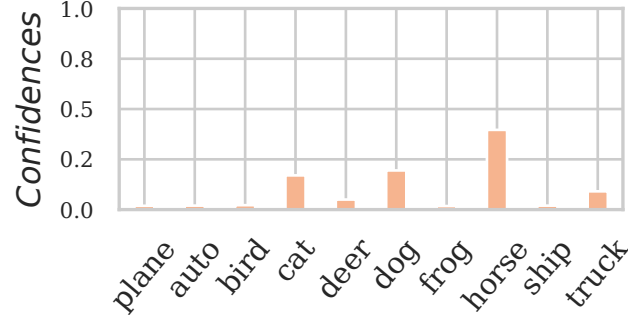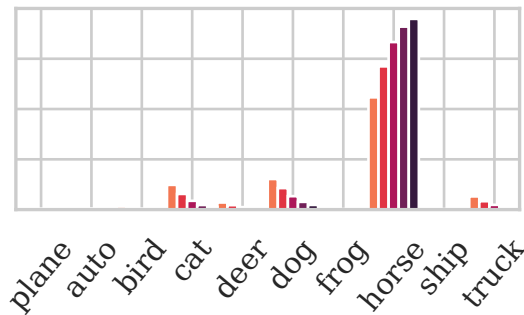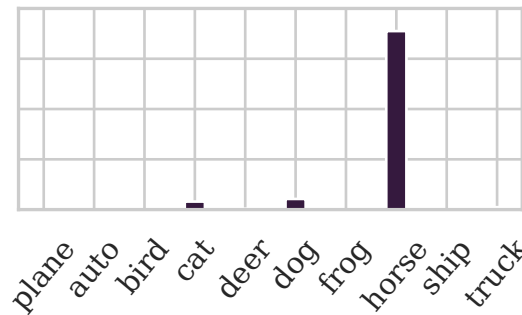

Supplement: supplementary_material [file attachment]

Images

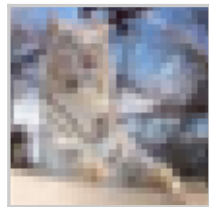

cat

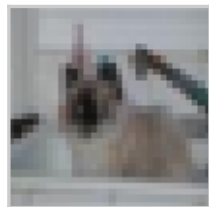

cat

Source

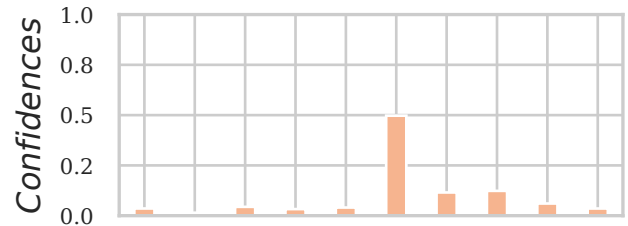

Diffusion Steps

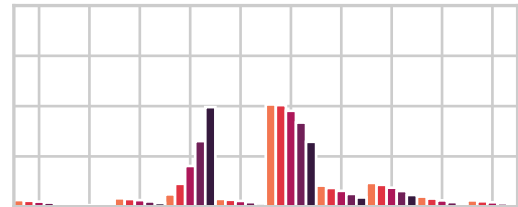

Target

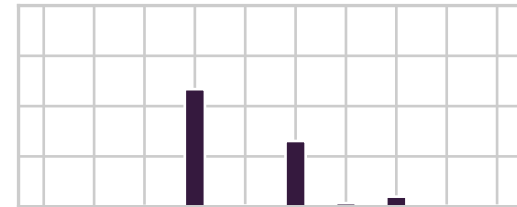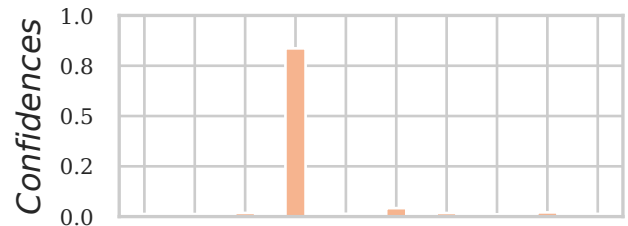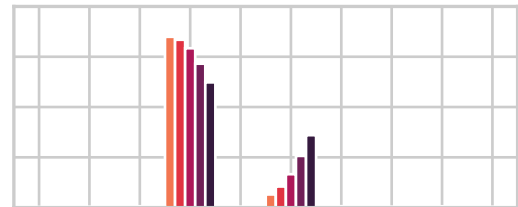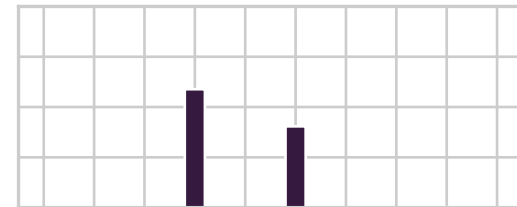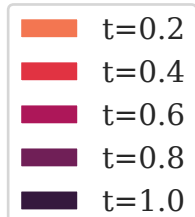

Supplement: supplementary_material [file attachment]

Images

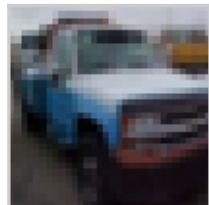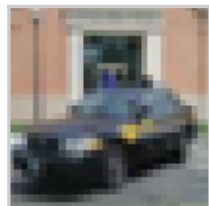

truck

auto

Source

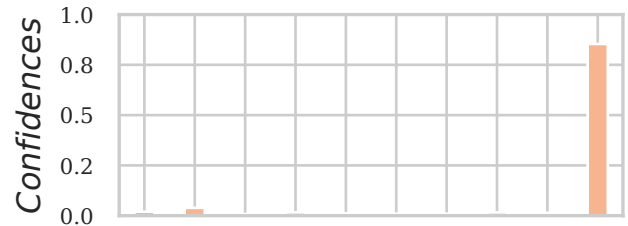

Diffusion Steps

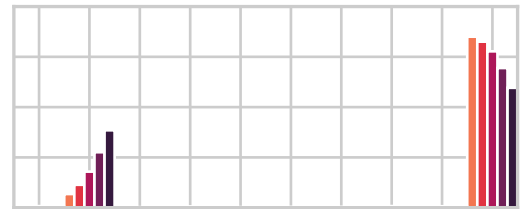

Target

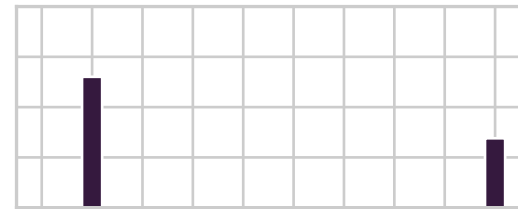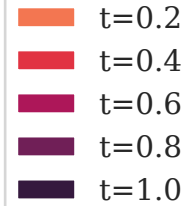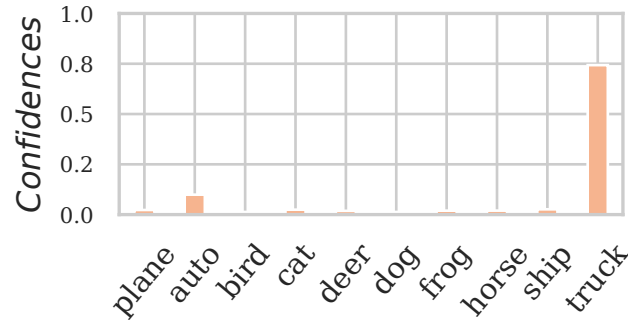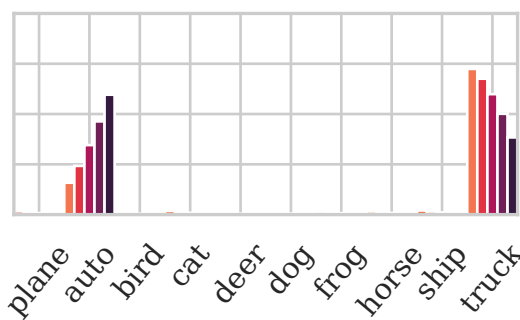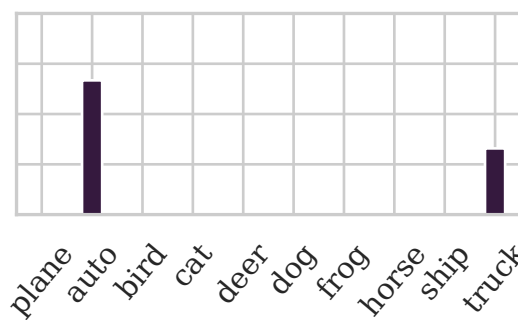

Supplement: supplementary_material [file attachment]

Images

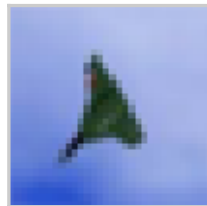

plane

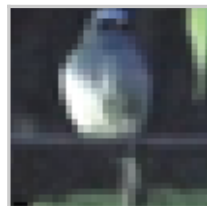

bird

Source

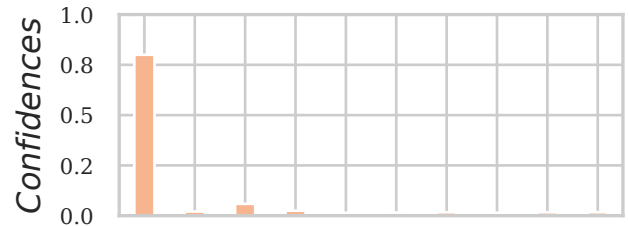

Diffusion Steps

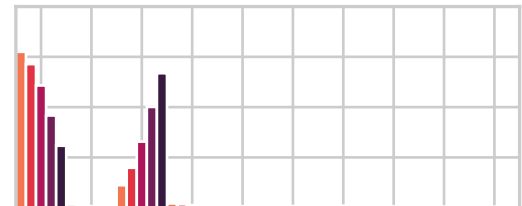

Target

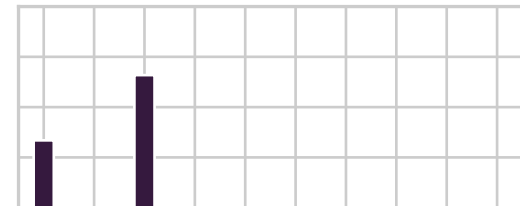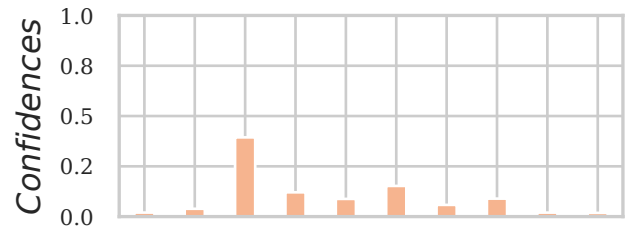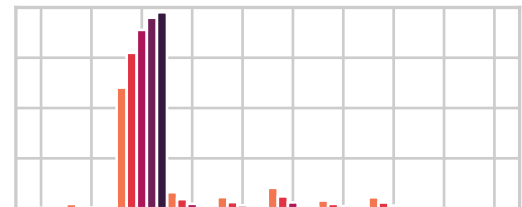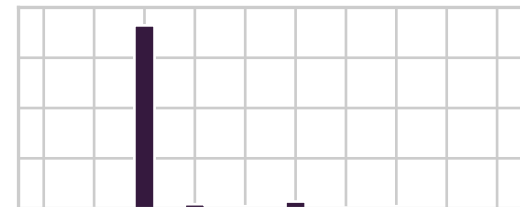

Supplement: supplementary_material [file attachment]
